# Supplementary material
Source: PubMed Central journal article supplement (PMC4687446)
Supplement: onc2014427x1.pdf [file onc2014427x1.pdf]

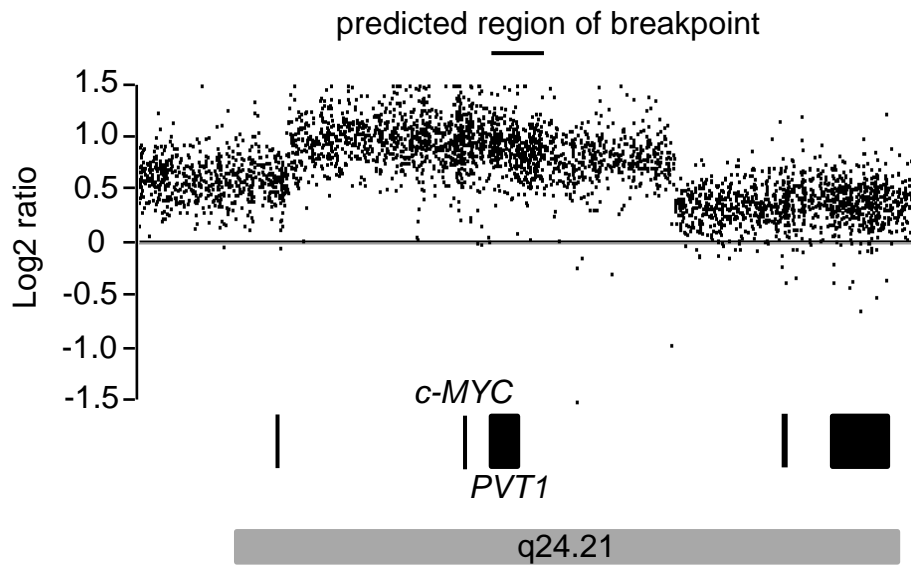

**Supplementary Figure 1. Cytoscan array copy number profile of chromosome 8 q24.21 in irradiated MCF-10A 80Gy cell clone.**

Cell clones derived by limiting dilution from MCF-10A cells irradiated with fractionated X-ray doses of 5Gy to a cumulative dose of 80Gy were assessed by Cytoscan array. All clones derived from the 80Gy population carried the 2.5Mb focal amplification encompassing *c-MYC*. Twelve of the 15 clones, including the one illustrated, carried the additional ~59Mb copy number gain with the telomeric breakpoint predicted in the region of the *PVT1* gene. Each point represents a single marker and their position is shown relative to cytogenetic band q24.21 and genes in this region. A log2 ratio of zero equates to a copy number of two.

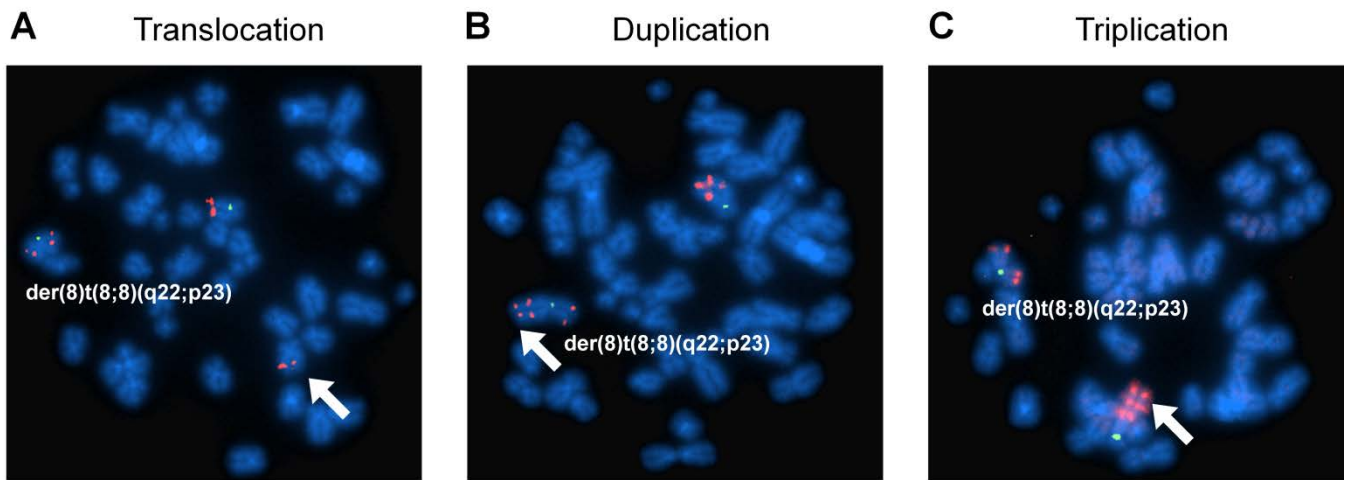

**Supplementary Figure 2. Alterations affecting the *c-MYC* locus in irradiated cell clones.**

Alterations affecting the *c-MYC* locus in addition to the dup8(q12-q24) and focal *c-MYC* amplification were detected by metaphase FISH analysis of the 80Gy cell population, and included: translocation of the *c-MYC* locus to an unidentified partner locus (A); a tandem duplication on der(8)t(8;8)(q22;p23), although it was not discernible on which chromosome arm the duplication occurred (B); a second tandem duplication of the dup(8)(q12-q24) chromosome, generating an overall triplication of the *c-MYC* loci (C). Each alteration is highlighted on the FISH images by a white arrow.

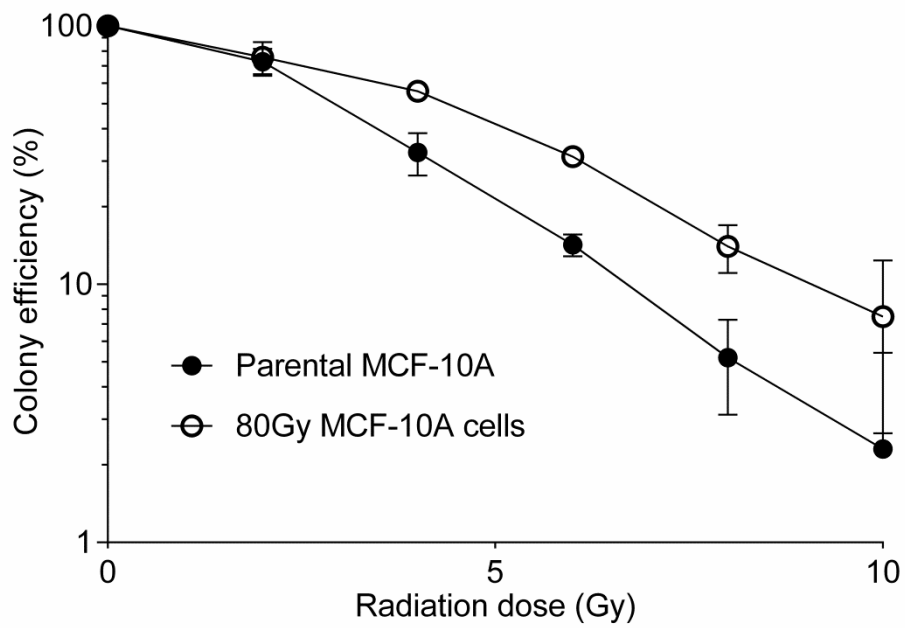

**Supplementary Figure 3. Clonogenic survival of parental and 80Gy MCF-10A cell populations in response to X-irradiation.**

Cell survival of parental and 80Gy MCF10-A cell populations in response to X-irradiation was determined using clonogenic survival 7 days after treatment. Plot shows mean and standard deviation from three independent experiments scored by two independent researchers.  $p=0.0027$ , two-way ANOVA

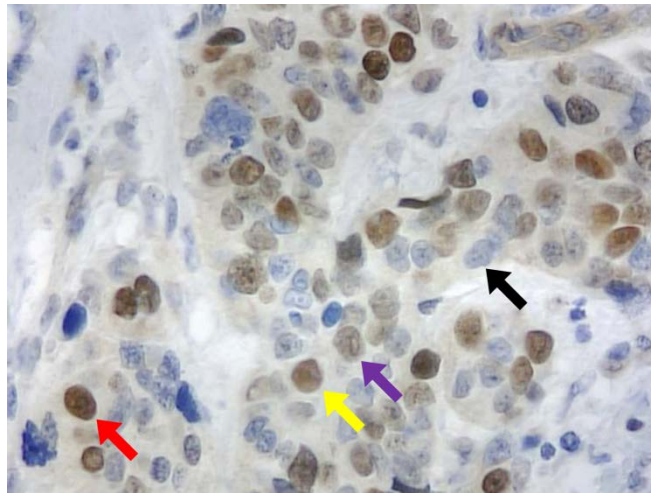

**Supplementary Figure 4. Analysis of *c-MYC* expression.**

Formalin-fixed, paraffin-embedded tissue from sporadic (n=33) and radiogenic (n=18) breast cancers were sectioned and analysed by immunohistochemistry with a specific *c-MYC* antibody as described in the Materials and Methods. Five hundred nuclei from malignant sections were assessed for *c-MYC* staining and assigned a score between 0 and 3 depending on the intensity of staining. The black arrow highlights an example of a nucleus assigned with a score of 0 (no *c-MYC* staining), the purple arrow a nucleus assigned a score of 1, the yellow arrow a nucleus assigned a score of 2 and the red arrow a nucleus assigned a score of 3. A total histoscore for each sample was calculated by the sum of the scores given to each nucleus.

## Supplementary Table 1

Copy number alterations in MCF-10A cells irradiated with 5Gy fractions to a cumulative dose of 80Gy which display *c-MYC* copy number gain

| Chromosome                     | Start Pos (bp) <sup>A</sup> | End Pos (bp) <sup>A</sup> | Size (kb) | Genes Affected                    | Parental MCF-10A copy number | Population alteration first detected | Nature of alteration       |
|--------------------------------|-----------------------------|---------------------------|-----------|-----------------------------------|------------------------------|--------------------------------------|----------------------------|
| 10q23.2                        | 88501217                    | 88649027                  | 147.81    | BMPR1A                            | 2                            | 40 Gy                                | Mono-allelic deletion      |
| 8q24.21                        | 127621008                   | 130125337                 | 2504.33   | <i>c-MYC</i> ,<br>PVT1,<br>TMEM75 | 3                            | 40 Gy                                | Undefined copy number gain |
| 8q13.3-<br>q24.21 <sup>B</sup> | 71160976                    | 127621008 -<br>130125337  | ~ 59000   | Many                              | 2/3                          | 60 Gy                                | Mono-allelic gain          |

<sup>A</sup> Base positions represent individual SNP marker positions

<sup>B</sup> Represents a single alteration that spans two regions with different copy number states. Note that this alteration also spans the 2.5 Mb copy number increase that spans *c-MYC* first identified in the 40 Gy population.

## Supplementary Table 2

### Copy number alterations in MCF-10A cells irradiated with 10Gy fractions to a cumulative dose of 80Gy

Acquired copy number alterations were observed in only one of the two 10Gy 10Gy irradiated MCF-10A series.

| Chromosome                | Start Pos (bp) <sup>A</sup> | End Pos (bp) <sup>A</sup> | Size (kb)     | Genes Affected                                 | Parental MCF-10A copy number | Population alteration first detected | Nature of alteration  |
|---------------------------|-----------------------------|---------------------------|---------------|------------------------------------------------|------------------------------|--------------------------------------|-----------------------|
| 2q33.3                    | 206560040                   | 206699229                 | 139.18<br>9   | FLJ20309,<br>NDUFS1                            | 2                            | 80 Gy                                | Mono-allelic deletion |
| 4p16.3-p16.1              | 56707                       | 6573579                   | 6516.8<br>72  | Many                                           | 2                            | 40 Gy                                | Mono-allelic deletion |
| 9p24.3-p21.3 <sup>B</sup> | 36587                       | 36549683                  | 36513.<br>096 | Many                                           | 2/1                          | 40 Gy                                | Mono-allelic gain     |
| 10p14                     | 8802113                     | 9179270                   | 377.15<br>7   | 0                                              | 2                            | 80 Gy                                | Mono-allelic gain     |
| 10p11.23                  | 28428290                    | 28483377                  | 55.087        | MPP7                                           | 2                            | 40 Gy                                | Mono-allelic deletion |
| 12q24.31-q24.33           | 120606484                   | 132287718                 | 11681.<br>234 | Many                                           | 2                            | 80 Gy                                | Mono-allelic deletion |
| 18q23.3                   | 75798195                    | 76009174                  | 210.97<br>9   | PQLC1, TXNL4A,<br>C18orf22,<br>ADNP2           | 2                            | 80 Gy                                | Mono-allelic gain     |
| 20                        |                             | Whole Chromosome          |               |                                                | 2                            | 10 Gy                                | Mono-allelic gain     |
| 22q13.2                   | 39829375                    | 39905513                  | 76.138        | EP300                                          | 2                            | 10 Gy                                | Mono-allelic deletion |
| Xq22.3                    | 105900223                   | 106395258                 | 495.03<br>5   | TBC1D8B,<br>CLDN2, MORC4,<br>RBM41,<br>NUP6CL2 | 2                            | 80 Gy                                | Mono-allelic deletion |
| Xq23.3                    | 114276787                   | 114389568                 | 112.78<br>1   | LRCH2                                          | 2                            | 80 Gy                                | Mono-allelic deletion |

<sup>A</sup> Base positions represent individual SNP marker positions

<sup>B</sup> Represents a single alteration that spans a number of regions regions with different copy number states.

### Supplementary Table 3

#### Copy number alterations in MCF-10A cells irradiated with 5Gy fractions to a cumulative dose of 80Gy (second series)

| Chromosome                 | Start Pos (bp) <sup>A</sup> | End Pos (bp) <sup>A</sup> | Size (kb) | Genes Affected                            | Parental MCF-10A copy number | Population alteration first detected | Nature of alteration  |
|----------------------------|-----------------------------|---------------------------|-----------|-------------------------------------------|------------------------------|--------------------------------------|-----------------------|
| 1q24.1-24.2                | 165154658                   | 165756926                 | 602.268   | <i>MAEL, GPA33, DUSP27, POU2F1, CD247</i> | 3                            | 40 Gy                                | Mono-allelic deletion |
| 1q25.2-31.3                | 176867954                   | 193499072                 | 16631.118 | Many                                      | 3                            | 40 Gy                                | Mono-allelic deletion |
| 1q21.1-q31.1 <sup>B</sup>  | 143183331                   | 193499072                 | 50315.741 | Many                                      | 3                            | 80 Gy                                | Mono-allelic deletion |
| 2p23.1-22.3                | 31176346                    | 36986182                  | 5809.836  | Many                                      | 2                            | 40 Gy                                | Mono-allelic deletion |
| 2q31.1                     | 176169514                   | 176771255                 | 601.741   | <i>KIAA1715, EVX2, HOXD1,2,4,8-16</i>     | 2                            | 55 Gy                                | Mono-allelic deletion |
| 4p16.3-914                 | 56707                       | 37078497                  | 37021.79  | Many                                      | 2                            | 40 Gy                                | Mono-allelic deletion |
| 5q15-q35.3 <sup>B</sup>    | 93621043                    | 180652396                 | 87031.353 | Many                                      | 2/3                          | 40 Gy                                | Mono-allelic gain     |
| 5q23.3-35.3                | 129632118                   | 180652396                 | 51020.278 | Many                                      | 3                            | 55 Gy                                | Mono-allelic deletion |
| 5q22.2                     | 112200585                   | 112380304                 | 179.719   | <i>SRP19, REEP5, DCP2</i>                 | 2                            | 80 Gy                                | Mono-allelic gain     |
| 7q21.13                    | 88668206                    | 88771110                  | 102.904   | <i>ZNF8048</i>                            | 2                            | 40 Gy                                | Mono-allelic gain     |
| 10p15.1                    | 5536697                     | 5692243                   | 155.546   | <i>CALML3</i>                             | 2                            | 55 Gy                                | Mono-allelic gain     |
| 11q22.3-q23.3              | 103769002                   | 116689124                 | 12920.122 | Many                                      | 2                            | 40 Gy                                | Mono-allelic deletion |
| 11q12.3-q25 <sup>B</sup>   | 62318238                    | 134449982                 | 72131.744 | Many                                      | 2                            | 55 Gy                                | Mono-allelic gain     |
| 12q21.1                    | 70892777                    | 72832799                  | 1940.022  | <i>TRHDE</i>                              | 2                            | 55 Gy                                | Mono-allelic deletion |
| 14q22.3                    | 54914289                    | 55027066                  | 112.777   | <i>KIAA0831, TBPL2</i>                    | 2                            | 40 Gy                                | Mono-allelic gain     |
| 15q24.2-q26.3 <sup>B</sup> | 74222695                    | 100276767                 | 26054.072 | Many                                      | 2/1                          | 80 Gy                                | Mono-allelic gain     |
| 16p13.3                    | 765                         | 1985736                   | 1984.971  | Many                                      | 2                            | 80 Gy                                | Mono-allelic deletion |
| 18q21.2-q22.3              | 48080079                    | 70114155                  | 22034.076 | Many                                      | 2                            | 40 Gy                                | Mono-allelic deletion |
| 19p13.3                    | 41898                       | 4609892                   | 4567.994  | Many                                      | 2                            | 80 Gy                                | Mono-allelic deletion |
| 20p13                      | 9293                        | 4428933                   | 4419.64   | Many                                      | 2                            | 80 Gy                                | Mono-allelic deletion |
| 22q13.2                    | 39820139                    | 39905513                  | 85.374    | <i>EP300</i>                              | 2                            | 10 Gy                                | Mono-allelic deletion |
| Xp22.2                     | 10392905                    | 10625012                  | 232.107   | <i>MID1</i>                               | 2                            | 40 Gy                                | Mono-allelic gain     |

<sup>A</sup> Base positions represent individual SNP marker positions

<sup>B</sup> Represents a single alteration that spans a number of regions with different copy number states.

## Supplementary Table 4

### Radiogenic breast cancer cases

| Sample | Age of HL <sup>A</sup><br>Diagnosis (years) | Age of BC <sup>B</sup> Diagnosis<br>(years) | Latency Between HL and BC<br>(years) | Breast Cancer Pathology |
|--------|---------------------------------------------|---------------------------------------------|--------------------------------------|-------------------------|
| RAD1   | 22                                          | 40                                          | 17                                   | IDC <sup>C</sup>        |
| RAD2   | 23                                          | 46                                          | 22                                   | ILC <sup>D</sup>        |
| RAD3   | 17                                          | 30                                          | 12                                   | ILC                     |
| RAD4   | 19                                          | 31                                          | 11                                   | IDC                     |
| RAD5   | 28                                          | 39                                          | 10                                   | IDC                     |
| RAD6   | 16                                          | 39                                          | 22                                   | IDC                     |
| RAD7   | 18                                          | 28                                          | 10                                   | IDC                     |
| RAD8   | 22                                          | 47                                          | 24                                   | IDC                     |
| RAD9   | 29                                          | 46                                          | 17                                   | adenocarcinoma IDC      |
| RAD10  | 26                                          | 45                                          | 18                                   | IDC                     |
| RAD11  | 27                                          | 35                                          | 7                                    | comedocarcinoma         |
| RAD12  | 21                                          | 37                                          | 12                                   | IDC                     |
| RAD13  | 29                                          | 42                                          | 13                                   | IDC                     |
| RAD14  | 21                                          | 35                                          | 14                                   | IDC                     |
| RAD15  | 18                                          | 41                                          | 22                                   | IDC                     |
| RAD16  | 21                                          | 34                                          | 13                                   | IDC                     |
| RAD17  | 16                                          | 35                                          | 19                                   | tubular adenocarcinoma  |
| RAD18  | 19                                          | 32                                          | 13                                   | Comedocarcinoma         |

<sup>A</sup> Hodgkin Lymphoma, <sup>B</sup> Breast Cancer, <sup>C</sup> Infiltrating ductal carcinoma, <sup>D</sup> Infiltrating lobular carcinoma



## Supplementary Table 5

### Sporadic breast cancer cases

| Sample | Age of BC Diagnosis (years) | Breast Cancer Pathology                     |
|--------|-----------------------------|---------------------------------------------|
| SPO1   | 43                          | IDC                                         |
| SPO2   | 43                          | IDC                                         |
| SPO3   | 36                          | comedocarcinoma                             |
| SPO4   | 44                          | IDC                                         |
| SPO5   | 39                          | IDC + DCIS                                  |
| SPO6   | 46                          | IDC                                         |
| SPO7   | 42                          | IDC+DCIS                                    |
| SPO8   | 44                          | IDC                                         |
| SPO9   | 38                          | IDC                                         |
| SPO10  | 37                          | IDC + comedocarcinoma                       |
| SPO11  | 44                          | IDC                                         |
| SPO12  | 47                          | IDC                                         |
| SPO13  | 35                          | IDC                                         |
| SPO14  | 47                          | IDC                                         |
| SPO15  | 43                          | IDC                                         |
| SPO16  | 38                          | IDC                                         |
| SPO17  | 37                          | IDC                                         |
| SPO18  | 41                          | ILC                                         |
| SPO19  | 47                          | IDC + DCIS                                  |
| SPO20  | 32                          | comedocarcinoma                             |
| SPO21  | 49                          | IDC                                         |
| SPO22  | 47                          | IDC                                         |
| SPO23  | 48                          | IDC                                         |
| SPO24  | 33                          | ILC + IDC                                   |
| SPO25  | 32                          | IDC + DCIS                                  |
| SPO26  | 41                          | IDC                                         |
| SPO27  | 34                          | IDC                                         |
| SPO28  | 45                          | IDC                                         |
| SPO29  | 37                          | IDC                                         |
| SPO30  | 39                          | IDC                                         |
| SPO31  | 28                          | mammary Paget's disease + DCIS <sup>A</sup> |
| SPO32  | 39                          | IDC + mammary Paget's disease + DCIS        |
| SPO33  | 45                          | IDC                                         |

<sup>A</sup> Ductal carcinoma in situ

Supplementary Table 6

Copy number analysis of *c-MYC* and chromosome 8 in sporadic and radiogenic breast cancer.

|       | Copy number of probe <sup>A</sup> |          |          |          |          |         |        |        |        |    |    |    |    |    |
|-------|-----------------------------------|----------|----------|----------|----------|---------|--------|--------|--------|----|----|----|----|----|
|       | 1                                 | 2        | 3        | 4        | 5        | 6       | 7      | 8      | 9      | 10 | 11 | 12 | 13 | 14 |
| SPO2  | 5<br>38                           | 53<br>62 | 8        | 6        | 21       | 5       | 2      |        |        |    |    |    |    |    |
| SPO5  | 7<br>7                            | 82<br>79 | 10<br>9  | 1<br>5   |          |         |        |        |        |    |    |    |    |    |
| SPO6  | 16<br>17                          | 77<br>79 | 4<br>3   | 3<br>1   |          |         |        |        |        |    |    |    |    |    |
| SPO7  | 8<br>8                            | 44<br>48 | 13<br>12 | 29<br>25 | 3<br>3   | 3<br>2  | 1<br>1 |        |        | 1  |    |    |    |    |
| SPO10 | 7<br>7                            | 88<br>80 | 3<br>9   | 1<br>1   | 1<br>1   | 1<br>1  | 1<br>1 |        |        |    |    |    |    |    |
| SPO11 |                                   | 62<br>66 | 5<br>7   | 5<br>11  | 14<br>8  | 9<br>6  | 2      | 2      | 1      |    | 1  | 1  |    |    |
| SPO13 | 16<br>4                           | 74<br>88 |          | 10<br>2  |          |         |        |        |        |    |    |    |    |    |
| SPO15 | 10<br>9                           | 89<br>88 | 1<br>3   |          |          |         |        |        |        |    |    |    |    |    |
| SPO17 | 4<br>3                            | 56<br>49 | 10<br>8  | 14<br>19 | 8<br>13  | 3<br>4  | 5<br>3 | 1      |        |    |    |    |    |    |
| SPO18 | 10<br>7                           | 66<br>66 | 18<br>21 | 6<br>6   |          |         |        |        |        |    |    |    |    |    |
| SPO21 | 10<br>7                           | 62<br>62 | 12<br>23 | 4<br>7   | 5        | 4       | 1      | 2      |        |    |    |    |    |    |
| SPO22 | 15<br>17                          | 76<br>76 | 4<br>5   | 4<br>2   | 1        |         |        |        |        |    |    |    |    |    |
| SPO24 | 5<br>14                           | 70<br>71 | 15<br>13 | 8<br>2   | 2        |         |        |        |        |    |    |    |    |    |
| SPO26 | 9<br>4                            | 39<br>50 | 36<br>43 | 16<br>2  | 1        |         |        |        |        |    |    |    |    |    |
| SPO27 | 8<br>13                           | 67<br>71 | 20<br>12 | 1<br>3   | 2        | 2       | 1      |        |        |    |    |    |    |    |
| SPO28 | 4<br>7                            | 48<br>83 | 30<br>9  | 18<br>1  |          |         |        |        |        |    |    |    |    |    |
| SPO29 | 5<br>6                            | 38<br>44 | 15<br>7  | 42<br>43 |          |         |        |        |        |    |    |    |    |    |
| SPO30 | 15<br>40                          | 73<br>52 | 9<br>6   | 3<br>2   |          |         |        |        |        |    |    |    |    |    |
| SPO31 | 12<br>7                           | 76<br>77 | 10<br>14 | 1<br>2   |          |         | 1      |        |        |    |    |    |    |    |
| SPO32 | 7<br>17                           | 83<br>67 | 6<br>14  | 4<br>2   |          |         |        |        |        |    |    |    |    |    |
| RAD1  |                                   | 44<br>7  | 8<br>16  | 32<br>18 | 2<br>8   | 11<br>4 | 2<br>3 | 1      |        |    |    |    |    |    |
| RAD2  | 4<br>9                            | 92<br>84 | 2<br>4   | 2<br>3   |          |         |        |        |        |    |    |    |    |    |
| RAD3  | 1<br>17                           | 48<br>47 | 48<br>36 | 3        |          |         |        |        |        |    |    |    |    |    |
| RAD4  | 5<br>4                            | 92<br>94 | 1<br>2   | 2        |          |         |        |        |        |    |    |    |    |    |
| RAD5  |                                   | 55<br>2  | 4<br>25  | 32<br>9  | 9<br>1   |         |        |        |        |    |    |    |    |    |
| RAD8  | 1<br>9                            | 22<br>35 | 11<br>9  | 40<br>40 | 17<br>2  | 5<br>2  | 1<br>2 | 1<br>1 | 1<br>1 | 1  |    |    |    |    |
| RAD9  |                                   | 41<br>13 | 3<br>79  | 15<br>4  | 22<br>4  | 7       | 7      | 2      |        | 2  |    |    | 1  |    |
| RAD10 |                                   | 53<br>11 |          |          | 3<br>5   | 5<br>1  | 1      | 8      | 13     | 6  | 5  | 5  |    | 1  |
| RAD17 | 2<br>2                            | 56<br>60 | 4<br>5   | 6<br>14  | 20<br>18 | 12      |        |        |        |    |    |    | 1  |    |

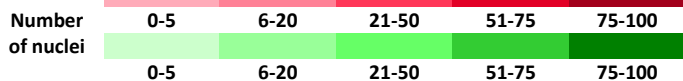

<sup>A</sup> The copy number of each probe is indicated at the top of the table. For each sample the number of nuclei which contain a particular copy number for *c-MYC* (red) and chromosome 8 centromere (green) are shown.

## Supplementary Table 7

### *c-MYC* and chromosome centromere 8 copy number in radiogenic and sporadic breast cancer

| Sample | Mean <i>c-MYC</i> copy number | Mean chromosome 8 copy number | <i>c-MYC</i> : chromosome 8 copy number ratio <sup>A</sup> | % of nuclei <i>c-MYC</i> copy number $\geq 3$ | % of nuclei chromosome 8 copy number $\geq 3$ | % of tumour nuclei in each sample <sup>B</sup> |
|--------|-------------------------------|-------------------------------|------------------------------------------------------------|-----------------------------------------------|-----------------------------------------------|------------------------------------------------|
| SPO2   | 3.08                          | 1.62                          | 1.90                                                       | 42                                            | 0                                             | 80                                             |
| SPO5   | 2.05                          | 2.12                          | 0.97                                                       | 11                                            | 14                                            | 55                                             |
| SPO6   | 1.94                          | 1.88                          | 1.03                                                       | 7                                             | 4                                             | 70                                             |
| SPO7   | 2.84                          | 2.84                          | 1.00                                                       | 48                                            | 44                                            | 70                                             |
| SPO10  | 2.02                          | 2.16                          | 0.94                                                       | 5                                             | 13                                            | 85                                             |
| SPO11  | 3.22                          | 2.94                          | 1.10                                                       | 38                                            | 34                                            | 75                                             |
| SPO13  | 2.04                          | 2.06                          | 0.99                                                       | 10                                            | 8                                             | 90                                             |
| SPO15  | 1.91                          | 1.94                          | 0.98                                                       | 1                                             | 3                                             | 45                                             |
| SPO17  | 2.95                          | 3.19                          | 0.92                                                       | 40                                            | 48                                            | 80                                             |
| SPO18  | 2.20                          | 2.26                          | 0.97                                                       | 24                                            | 27                                            | 50                                             |
| SPO21  | 2.58                          | 2.34                          | 1.10                                                       | 28                                            | 31                                            | 70                                             |
| SPO22  | 2.00                          | 1.92                          | 1.04                                                       | 9                                             | 7                                             | 50                                             |
| SPO24  | 2.32                          | 2.03                          | 1.14                                                       | 25                                            | 15                                            | 65                                             |
| SPO26  | 2.59                          | 2.46                          | 1.05                                                       | 52                                            | 46                                            | 75                                             |
| SPO27  | 2.28                          | 2.09                          | 1.09                                                       | 25                                            | 16                                            | 55                                             |
| SPO28  | 2.62                          | 2.04                          | 1.28                                                       | 48                                            | 10                                            | 35                                             |
| SPO29  | 2.94                          | 2.87                          | 1.02                                                       | 57                                            | 50                                            | 80                                             |
| SPO30  | 2.00                          | 1.7                           | 1.18                                                       | 12                                            | 8                                             | 45                                             |
| SPO31  | 2.05                          | 2.11                          | 0.97                                                       | 12                                            | 16                                            | 20                                             |
| SPO32  | 2.07                          | 2.01                          | 1.03                                                       | 10                                            | 16                                            | 50                                             |
| <hr/>  |                               |                               |                                                            |                                               |                                               |                                                |
| RAD1   | 3.38                          | 3.00                          | 1.13                                                       | 56                                            | 49                                            | 75                                             |
| RAD2   | 2.02                          | 2.01                          | 1.00                                                       | 4                                             | 7                                             | 85                                             |
| RAD3   | 2.53                          | 2.19                          | 1.16                                                       | 51                                            | 36                                            | 90                                             |
| RAD4   | 2.00                          | 1.98                          | 1.01                                                       | 3                                             | 2                                             | 30                                             |
| RAD5   | 2.95                          | 2.44                          | 1.21                                                       | 45                                            | 35                                            | 90                                             |
| RAD8   | 3.87                          | 3.10                          | 1.25                                                       | 77                                            | 56                                            | 80                                             |
| RAD9   | 4.01                          | 1.99                          | 2.02                                                       | 59                                            | 8                                             | 90                                             |
| RAD10  | 5.28                          | 2.11                          | 2.50                                                       | 47                                            | 15                                            | 65                                             |
| RAD17  | 3.22                          | 2.91                          | 1.11                                                       | 42                                            | 38                                            | 85                                             |

<sup>A</sup> For each sample mean *c-MYC* and chromosome 8 copy number was calculated. The ratio between these values was calculated by dividing mean *c-MYC* copy number score by mean centromere 8 copy number score.

<sup>B</sup> The estimated percentage of tumour nuclei counted in each sample was determined following histopathological examination of the paraffin embedded tissue samples used for nuclei extraction.

### Supplementary Table 8

**c-MYC copy number and c-MYC expression histoscores of sporadic and radiogenic breast cancer cohorts analysed by FISH.**

| Sample | c-MYC Score | Histoscore |
|--------|-------------|------------|
| SPO2   | 3.08        | 147.6      |
| SPO5   | 2.05        | 0          |
| SPO6   | 1.94        | 2          |
| SPO7   | 2.84        | 0          |
| SPO10  | 2.02        | 0          |
| SPO11  | 3.22        | 12.2       |
| SPO13  | 2.04        | 6.6        |
| SPO15  | 1.91        | 0          |
| SPO17  | 2.95        | 47         |
| SPO18  | 2.20        | 0          |
| SPO21  | 2.58        | 29.8       |
| SPO22  | 2.00        | 0          |
| SPO24  | 2.32        | 0          |
| SPO26  | 2.59        | 0          |
| SPO27  | 2.28        | 27.8       |
| SPO28  | 2.62        | 0          |
| SPO29  | 2.94        | 17.2       |
| SPO30  | 2.00        | 72.2       |
| SPO31  | 2.05        | 64.2       |
| SPO32  | 2.07        | 0          |
| <hr/>  |             |            |
| RAD1   | 3.38        | 156.2      |
| RAD2   | 2.02        | 0          |
| RAD3   | 2.53        | 35.2       |
| RAD4   | 2.00        | 131.5      |
| RAD5   | 2.95        | 52.6       |
| RAD8   | 3.87        | 0          |
| RAD9   | 4.01        | 70.4       |
| RAD10  | 5.28        | 63.4       |
| RAD17  | 3.22        | 0          |
